# Supplementary material for: Identification, isolation and analysis of human gut-associated lymphoid tissues
Source: Springer Nature journal article supplement (doi:10.1038/s41596-020-00482-1), 2021-02-22
Supplement: MOESM1 [file 41596_2020_482_MOESM1_ESM12.pdf]

**Supplementary information**

---

**Identification, isolation and analysis of  
human gut-associated lymphoid tissues**

---

In the format provided by the  
authors and unedited

## Supplementary Table

---

**Supplementary Table 1** | Patients included in this study.

|                           | Non-diseased <sup>†</sup> | Crohn's Disease |
|---------------------------|---------------------------|-----------------|
| Number                    | 79                        | 5               |
| Age                       | 70.2 ± 9.3                | 48.2 ± 19.6     |
| Sex                       |                           |                 |
| Female                    | 44                        | 4               |
| Male                      | 35                        | 1               |
| Site                      |                           |                 |
| Terminal ileum            | 56*                       | -               |
| Recto-sigmoidal resection | 23                        | -               |
| Right-sided hemicolectomy | 56*                       | -               |
| Prox. Site:               |                           |                 |
| Cecum                     | 14**                      | 4               |
| Ascending                 | 21**                      | 1               |
| Transverse                | 25**                      | -               |
| Diagnosis                 |                           |                 |
| Volvulus                  | 2                         | -               |
| Diverticulitis            | 2                         | -               |
| Stenosis                  | 1                         | -               |
| Adenocarcinoma            | 74                        | -               |
| UICC score:               |                           |                 |
| 0                         | 13                        | -               |
| 1                         | 16                        | -               |
| 2                         | 22                        | -               |
| 3                         | 18                        | -               |
| 4                         | 5                         | -               |

† = Macroscopically normal intestinal tissue >10 cm from tumor (if present).

\* = Paired samples.

\*\* = Multiple sites sampled from some patients.

## Supplementary Video Legends

---

**Supplementary Video 1** | Turning over full-thickness colon and ileum wall at Step 1, showing the basal and luminal side of each tissue.

**Supplementary Video 2** | Cutting off fat, serosa and muscularis externa (Step 2) of colon.

**Supplementary Video 3** | Trimming submucosa (Step 5) of colon.

**Supplementary Video 4** | Initiation and peeling (Step 7) of colon.

**Supplementary Video 5** | Initiation and peeling (Step 7) of ileum.

**Supplementary Video 6** | Excision of methylene blue stained submucosal isolated lymphoid follicles from the peeled submucosa using a tissue punch (Step 12).

**Supplementary Video 7** | Identification of a submucosal isolated lymphoid follicle from the basal side, and its association with a mucosal invagination on the luminal side, before the initiation of peeling (Step 6).

**Supplementary Video 8** | Excision of mucosal isolated lymphoid follicles from peeled sigmoid colon lamina propria using a scalpel (Step 12).

## **Supplementary Methods**

---

### **Quantification of GALT numbers and size**

GALT size and number for **Fig. 4** and **Extended Data Fig. 1C-D** were analyzed as previously described<sup>8</sup>. SM-ILF and M-ILF size and number were assessed from images of MB counterstained SM or (unstained) peeled LP, respectively, using ImageJ (v 1.51k) software, assessing at least 2.5 cm<sup>2</sup> SM/LP per patient. Follicle area was obtained using the “circle” and

“ROI Manager” tools, providing a pixel count, followed by conversion of this pixel count into an area (mm<sup>2</sup>) based on a size bar, and finally using this to calculate the diameter. Only SM-ILF that had a circular shape with no irregularities were categorized as a SM-ILF. Other structures were categorized as either double/irregular or 3+ GALT based on their morphology and number of visible follicles<sup>8</sup>. The area of the double/irregular or 3+ GALT were calculated similar to SM-ILF, but with the “polygon” tool replacing the “circle” tool.

## **Flow cytometry**

Flow cytometry was used in this study as an auxiliary method to determine leukocyte viability (**Fig. 2A**), cell numbers for individual isolated lymphoid follicles (**Fig. 2B-C**), the percentage of total leukocytes made up by various innate lymphoid cell subsets (**Fig. 3A-B** and **Extended Data Fig. 2**), and the effect of MB (**Extended Data Fig. 3**).

Digested cells were spun down (400 *g* for 5 min) and blocked in Brilliant stain buffer containing 3% mouse serum for 10 min, before the antibody mixture (prepared in brilliant stain buffer) was added for another 30 min. Samples were washed twice in PBS containing 2% FCS (FACS buffer), before being spun down (400 *g* for 5 min) and resuspended in FACS buffer (300  $\mu$ l), and filtered through 40  $\mu$ m mesh filters into FACS tubes. For intracellular ROR $\gamma$ t staining, the Foxp3 Transcription Factor Staining Buffer Set wash used. First, digested cells were spun down (400 *g* for 5 min) and the pellets resuspended in Fixation buffer (100  $\mu$ l) for 30 min. Samples were then washed in Perm buffer before being spun down (500 *g* for 5 min) and resuspended in Perm buffer (50  $\mu$ l) containing 10% mouse serum for 15 min. Perm buffer (50  $\mu$ l) containing anti-human/mouse ROR $\gamma$ t PE antibody, at a final concentration of 1:20, was added and left to stain for 30 min. The samples were then washed twice in Perm Buffer and resuspended in FACS buffer (300  $\mu$ l) and filtered through 40  $\mu$ m mesh filters into FACS tubes. The samples were acquired using a custom Fortessa Flow cytometer and FACS Diva software, and data analyzed using FlowJo software. Compensation was performed using OneComp and UltraComp eBeads.

## **Flow cytometry reagents**

Brilliant stain buffer (BD; Cat. No. 566349).

Foxp3 / Transcription Factor Staining Buffer Set (Invitrogen, Thermo Fisher; cat. no. 00-5523-00).

Mouse serum (Sigma-Aldrich; cat. no. M5905-10ML).

Primary antibodies: CD45 BUV393 (BD; clone: HI30; cat. no. 563792; RRID:AB\_2744400), CD3 BV510 (BD; clone: UCHT1, cat. no. 563109; RRID:AB\_2732053), CD19 APC (BD; clone: HIB19, cat. no. 561742; RRID:AB\_10894000), CD19 BV786 (BD; clone: SJ25C1; cat. no. 563325; RRID:AB\_2744314), cKit PE-CF594 (BD; clone: YB5.B8; cat. no. 562407; RRID:AB\_11154595), cKit PE-Cy5 (BD; clone: YB5.B8; cat. no. 559879; RRID:AB\_397354), CD127 APC-R700 (BD; clone: HIL-7R-M21; cat. no. 565185; RRID:AB\_2739099), HLA-DR FITC (BD; clone: G46-6; cat. no. 560944; RRID:AB\_10562569), CD14 PE (Invitrogen; clone: 61D3, cat. no. 12-0149-42; RRID:AB\_10598367), CD64 BV421 (BD; clone: 10.1; cat. no. 562872; RRID:AB\_2737856), RORyt PE (eBioscience; clone: AFKJS-9; cat. no. 12-6988-82; RRID:AB\_1834470), rat IgG2a PE Isotype Control (eBioscience; clone: eBR2a; cat. no. 12-4321-80; RRID:AB\_1834380).

Viability dyes: 7-AAD (Invitrogen; cat. no. 00-6993-50), SYTOX™ Green (Thermo Fisher Scientific; cat. no. R37168), Fixable viability stain 440UV (BD; cat. no. 566332), Fixable Viability Dye eFluor™ 780 (eBioscience; cat. no. 65-0865-14). **! CAUTION** 7-AAD, CyTOX, Fixable viability stain 440UV and Fixable Viability Dye eFluor™ 780 are hazardous reagents and should be handled using protective gloves, eye protection and clothing.

**Brilliant stain buffer containing 3% mouse serum** - 3 µl mouse serum per 97 µl brilliant stain buffer. Prepare fresh.

**FACS buffer** - 2 µl mouse serum per 98 µl PBS. Can be stored for at least one week at 4°C.

**Fixation buffer** – add 1-part Fixation Permeabilization Concentrate and 3 parts Fixation/Perm Diluent. Prepare Fresh.

**Perm buffer** – Add 1-part Permeabilization Buffer 10x and 9 parts double distilled water. Prepare fresh.

### Flow cytometry equipment

FACS tubes (5 ml Polystyrene Round-Bottom Tube, 12x75 mm style; Fisher Scientific, Sweden)

FACS tubes with 40 µm mesh filter (5 ml Polystyrene Round-Bottom Tube with Cell-Strainer Cap, 12x75 mm style; Corning; Mexico).

Flow cytometer (Fortessa; BD).

OneComp eBeads™ (Invitrogen; cat. no. 01-1111-42).

UltraComp eBeads™ (Invitrogen; cat. no. 01-2222-42).

### Software

FACS Diva Software (v8.0.2).

FlowJo (v10.2).

## Immunohistochemistry

Confocal laser microscopy was used in this study as an auxiliary method to identify SM-ILF morphology in peeled SM (**Extended Data Fig. 1B**), to discern why PP could not be separated from the SM (**Extended Data Fig. 4B-C**), and to investigate the efficiency of separating LP and SM (**Extended Data Fig. 6**).

To prepare tissues for microscopy, intestinal samples including unseparated LP with SM, PP, as well as GALT-free LP and SM or separated tissue layers were fixed for 2-6h with 4% PFA in PBS at 4°C and 120 rpm. Fixed tissues were washed once and stored in histology wash/stain buffer. For imaging, washed tissues were either embedded in 4% low melting agarose in PBS and cut into 100 µm sections with a swinging blade microtome, or stained as whole tissues. For staining, sections and whole tissues were incubated overnight in 500 µl wash/stain buffer containing fluorescently labelled antibodies against epithelial cell adhesion molecule (EpCAM), alpha smooth muscle actin ( $\alpha$ SMA), CD3, CD19 and CD45 in the indicated combinations, together with 4,6-diamidino-2-phenylindole (DAPI) to highlight cell nuclei. After additional washing in 5 ml histology wash/stain buffer, tissues were mounted on glass slides using ProLong Gold. Whole tissues were cleared overnight and subsequently mounted in Omnipaque<sup>®</sup> (iohexol) on glass slides. Images were acquired using a LSM700 or LSM710 confocal laser microscope and processed using the Zen v2.3 or Imaris v8 software.

## Histology reagents

4,6-diamidino-2-phenylindole (DAPI; Thermo Fisher; cat. no. D1306; RRID: AB\_2629482).

Histology wash/stain buffer - 474ml PBS + 25ml FCS (5%) + 1ml Triton X-100 (0.2%). Can be stored for at least one week at 4°C.

Low-melting point agarose (Invitrogen, cat. no. 16520-100).

Paraformaldehyde (PFA, Sigma-Aldrich, cat. no. P6148). **! CAUTION** PFA is a hazardous reagent and should be handled in a chemical fume hood using protective gloves, clothes and mask.

Primary antibodies: Anti alpha smooth muscle actin Alexa Fluor<sup>®</sup> 488 (Abcam; clone 1A4; cat no. 184675; RRID: AB\_2832195), anti EpCAM – Alexa Fluor<sup>®</sup> 594 (Biolegend; clone 9C4; cat no. 324228; RRID: AB\_2563209), and anti CD45 – Alexa Fluor<sup>®</sup> 647 (Biolegend; clone HI30; cat no. 304018; RRID: AB\_389336), CD45 - Alexa Fluor<sup>®</sup> 488 (Biolegend; clone HI30; cat no.

304017; RRID: AB\_389314), anti CD3 - Alexa Fluor® 647 (BD Biosciences, clone UCHT1; cat no. 557706; RRID: AB\_396815), anti CD19 – PE-CF594 (BD Biosciences, clone HIB19; cat no. 562321; RRID: AB\_11153848).

ProLong Gold (Thermo Fisher, cat. no. P36930).

Triton-X100 (Sigma-Aldrich, cat. no. T8787).

Omnipaque (iohexol; GE Healthcare, cat. no. Y530).

### **Histology equipment**

Falcon® 24 well clear flat bottom plates (Corning, cat. no. 353047).

Swinging blade microtome (Vibratome VT1200S; Leica).

Confocal laser microscope (LSM700 and LSM710; Zeiss).

Polysine Adhesion Slides (Thermo Fisher; cat. no. 10219280).

Glass cover slips (Hounisen; cat. no. 0422.2432).

### **Software**

Imaris (version 8).

Zeiss Zen (v2.3).
